# Supplementary material
Source: ML conference proceedings conference paper supplement (https://openreview.net/forum?id=vy7B8z0-4D)
Supplement: supplementary_material [file attachment]

## A Appendix

In the following sections, we provide some additional material to ease the understanding of the underlying alignment problem as well as computational details of solutions of FUGW and FUGW barycenters.

We also show some control experiments during which we used different training data to compute pair-wise alignments and evaluated the proportion of correlation gains that comes from mere signal smoothing.

Eventually, we give details about the IBC dataset (acquisition, preprocessing, fMRI protocols and data splitting).

### A.1 Illustration of the alignment problem

We provide in Fig. S1 a conceptual illustration of the alignment framework for a pair of subjects.

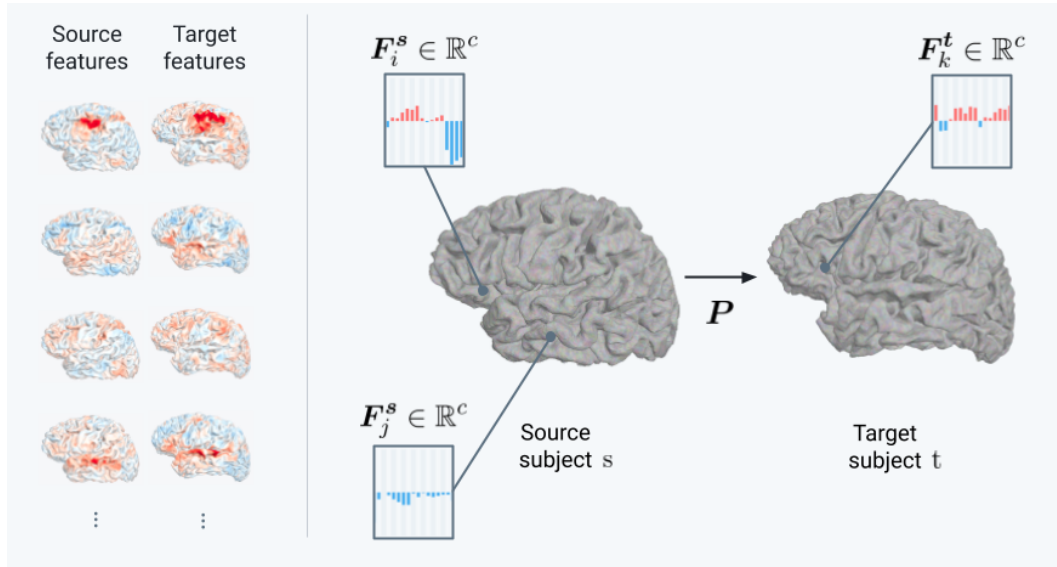

**Figure S1: Alignment of two brains using functional signatures** Using multiple maps of comparable features (left column) for the source and target subjects, we seek to derive an alignment (also referred to as a *coupling*)  $P$  that matches parts of the brain with similar features while preserving the global geometry of the cortex.

### A.2 Detailed description of FUGW estimation algorithm

Estimating the unbalanced Gromov Wasserstein (UGW) loss is numerically sensitive to initialization, due to the non-convexity of the problem [39]. Therefore FUGW is *a priori* non-convex as well, and comparably difficult to estimate. Consequently, following [39], we instead compute a lower bound which we formulate as a bi-convex problem that relies on the joint estimation of two couplings. We provide next a detailed derivation of this estimation procedure, using notations introduced in section 2:

$$\text{FUGW}(\mathcal{X}^s, \mathcal{X}^t) = \inf_{\substack{P, Q \geq 0 \\ P=Q}} L_\theta(P, Q) \geq \inf_{\substack{P, Q \geq 0 \\ m(P)=m(Q)}} L_\theta(P, Q) \triangleq \text{LB-FUGW}(\mathcal{X}^s, \mathcal{X}^t). \quad (\text{S1})$$

where  $m(P) = \sum_{i,j} P_{i,j}$  denotes the mass of  $P$ .

We give the explicit formulation of  $L_\theta(P, Q)$

$$L_\theta(P, Q) \triangleq (1 - \alpha) L_W(P, Q) + \alpha L_{GW}(P, Q) + \rho L_U(P, Q) + \varepsilon E(P, Q), \quad (\text{S2})$$

where

- $C \triangleq \left( \|F_i^s - F_j^t\|_2^2 \right)_{i,j} \in \mathbb{R}_+^2$  (feature cost matrix)
- $G \triangleq \left( |D_{i,j}^s - D_{k,l}^t| \right)_{i,j,k,l} \in \mathbb{R}_+^4$  (geometry cost matrix)
- $L_W(P, Q) \triangleq \langle C, \frac{P+Q}{2} \rangle = \frac{1}{2} (\sum_{i,j} C_{i,j} P_{i,j} + \sum_{i,j} C_{i,j} Q_{i,j})$  (Wasserstein)
- $L_{GW}(P, Q) \triangleq \langle G, P \otimes Q \rangle = \sum_{i,j,k,l} G_{i,j,k,l} P_{i,j} Q_{k,l}$  (Gromov-Wasserstein)
- $L_U(P, Q) \triangleq \text{KL}(P_{\#1} \otimes Q_{\#1} | w^s \otimes w^s) + \text{KL}(P_{\#2} \otimes Q_{\#2} | w^t \otimes w^t)$  (unbalancing)
- $E(P, Q) \triangleq \text{KL}(P \otimes Q | (w^s \otimes w^t) \otimes (w^s \otimes w^t))$  (entropy)

In particular, we have  $L_\theta(P, P) = L_\theta(P)$ , which is the objective function of FUGW introduced in Equation 1.

**Solver** We provide a Python GPU-based solver for LB-FUGW, using an approach similar to that of [39], which we recall in algorithm S1. More precisely, we alternatively optimize one coupling while keeping the other fixed. This results in two entropic unbalanced OT problems in each iteration, which can be solved using the scaling algorithm [11].

---

**Algorithm S1** Approximation scheme for LB-FUGW

---

**Input:**  $\mathcal{X}^s, \mathcal{X}^t, \rho, \alpha, \varepsilon$ .

**Output:** Pair of optimal couplings  $(P, Q)$ .

- 1: Initialize:  $P = Q = w^s \otimes w^t / \sqrt{m(w^s)m(w^t)}$ .
  - 2: **while**  $(P, Q)$  has not converged **do**
  - 3:   Calculate:  $c_P = \text{Cost}(P, G, C, w^s, w^t, \rho, \alpha, \varepsilon)$ .
  - 4:   Update:  $Q \leftarrow \text{Scaling}(c_P, w^s, w^t, \rho m(P), \varepsilon m(P))$ .
  - 5:   Rescale:  $Q \leftarrow \sqrt{\frac{m(P)}{m(Q)}} Q$ .
  - 6:   Calculate:  $c_Q = \text{Cost}(Q, G, C, w^s, w^t, \rho, \alpha, \varepsilon)$ .
  - 7:   Update:  $P \leftarrow \text{Scaling}(c_Q, w^s, w^t, \rho m(Q), \varepsilon m(Q))$ .
  - 8:   Rescale:  $P \leftarrow \sqrt{\frac{m(Q)}{m(P)}} P$ .
  - 9: **end while**
- 

---

**Algorithm S2** Scaling algorithm [11]

---

**Input:**  $C, w^s, w^t, \rho, \varepsilon$ .

**Output:** Optimal coupling  $P$ .

- 1: Initialize dual vectors:  $f = 0_n \in \mathbb{R}^n, g = 0_p \in \mathbb{R}^p$ .
  - 2: **while**  $(f, g)$  has not converged **do**
  - 3:   Update:  $f = -\frac{\rho}{\rho+\varepsilon} \log \sum_j \exp(g_j + \log w_j^t - \frac{C_{:,j}}{\varepsilon})$ .
  - 4:   Update:  $g = -\frac{\rho}{\rho+\varepsilon} \log \sum_i \exp(f_i + \log w_i^s - \frac{C_{i,:}}{\varepsilon})$ .
  - 5: **end while**
  - 6: Calculate:  $P = (w^s \otimes w^t) \exp(f \oplus g - \frac{C}{\varepsilon})$ .
- 

Here, the notations  $\otimes$  and  $\oplus$  denote the Kronecker product and sum, respectively. The exponential, division and logarithm operations are all element-wise. The scalar product is denoted by  $\langle \cdot, \cdot \rangle$ .

In practice, we observe that the two couplings of LB-FUGW are numerically equal, so it is enough to choose, for example, the first one, as alignment between source and target signals.

### A.3 Detailed description of FUGW barycenter estimation

FUGW-barycenter algorithm, described in Algorithm S4, alternates between computing mappings from subjects to the barycenter, and updating the barycenter. This corresponds to a block coordinate descent on the barycenter estimation. The first step simply uses the previously introduced solver. The

---

**Algorithm S3** Cost

---

**Input:**  $P, G, C, w^s, w^t, \rho, \alpha, \varepsilon$ .**Output:** Local cost  $c$ .

- 1: Calculate:  $G \otimes P := \left( \sum_{i,j} G_{i,j,k,l} P_{i,j} \right)_{k,l}$ .
- 2: Calculate:

$$c := \alpha G \otimes P + \frac{1-\alpha}{2} C + \rho \langle \log \frac{P_{\#1}}{w^s}, P_{\#1} \rangle + \rho \langle \log \frac{P_{\#2}}{w^t}, P_{\#2} \rangle + \varepsilon \langle \log \frac{P}{w^s \otimes w^t}, P \rangle$$


---

second one takes advantage of the fact that the objective function introduced in S1 is differentiable in  $F^B$  and  $D^B$ , and the two couplings of LB-FUGW are numerically equal. This yields a closed form for  $F^B$  and  $D^B$ , as a function of  $P^{s,B}$  and  $\mathcal{X}^s$ . We note that, during the barycenter estimation, the weight  $w^B$  is always fixed as uniform distribution.

---

**Algorithm S4** LB-FUGW barycenter

---

**Input:**  $(\mathcal{X}^s)_{s \in S}, \rho, \alpha, \varepsilon$ .**Output:** Individual couplings  $(P^{s,B})_{s \in S}$ , barycenter  $\mathcal{X}^B$ .

- 1: Initialize:  $F^B = \mathbb{I}_k$ ;  $D^B = \mathbb{0}_k$ .
- 2: **while**  $\mathcal{X}^B = (F^B, D^B, w^B)$  has not converged **do**
- 3:   Draw  $\tilde{S}$  subset of  $S$ .
- 4:   **for**  $s \in \tilde{S}$  **do** ▷ fixed  $\mathcal{X}^B$
- 5:     Align:  $P^{s,B} \leftarrow \text{LB-FUGW}(\mathcal{X}^s, \mathcal{X}^B, \rho, \alpha, \varepsilon)$ .
- 6:   **end for**
- 7:   Update  $F^B, D^B$ : ▷ fixed  $P^{s,B}$

$$F^B = \frac{1}{|\tilde{S}|} \sum_{s \in \tilde{S}} \text{diag} \left( \frac{1}{P_{\#2}^{s,B}} \right) (P^{s,B})^\top F^s \text{ and } D^B = \frac{1}{|\tilde{S}|} \sum_{s \in \tilde{S}} \frac{(P^{s,B})^\top D^s P^{s,B}}{P_{\#2}^{s,B} (P_{\#2}^{s,B})^\top}.$$

8: **end while**

---

**A.4 Implementation details**

**MSM configuration** We use the default configuration of MSM<sup>3</sup> and vary parameter *lambda* so as to obtain the best gains in correlation on the test set. We use the same value of *lambda* at each step of MSM and eventually set it to 0.1 after a cross validated grid search.

**Correlation gain variability when aligning pairs of subjects** Figures S2 and S3 show correlation gains on the validation and test sets respectively when aligning pairs of subjects from the IBC dataset. Subjects' data was previously projected onto *fsaverage5*. These figures provide us with a better understanding of the standard error and consistency of these gains. Moreover, they show that selection of the best set of hyper-parameters is robust to changing the validation data.

---

<sup>3</sup>MSM default configuration [https://github.com/ecr05/MSM\\_HOCR/blob/master/config/basic\\_configs/config\\_standard\\_MSMPair](https://github.com/ecr05/MSM_HOCR/blob/master/config/basic_configs/config_standard_MSMPair)

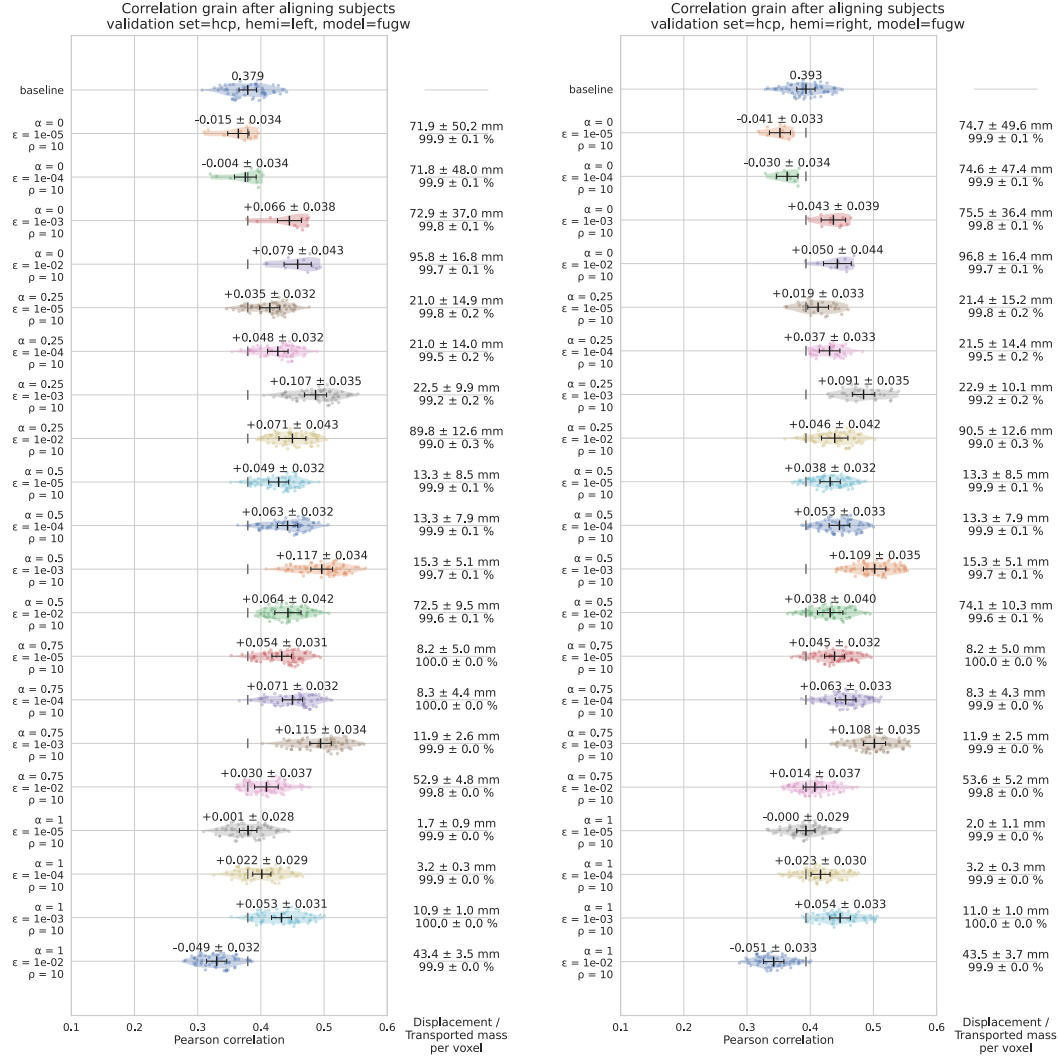

**Figure S2: Detailed correlation gains on the validation set (HCP tasks), in the balanced case**  
Each line represents a FUGW model trained with different hyper-parameters. Each dot represents the mean correlation between contrast maps of the HCP protocol for a given pair of IBC subjects. We compare the average correlation with that of the baseline (top row) where subjects were simply projected on *fsaverage5*. Models for the left hemisphere and right hemisphere are shown respectively on the left and right side.

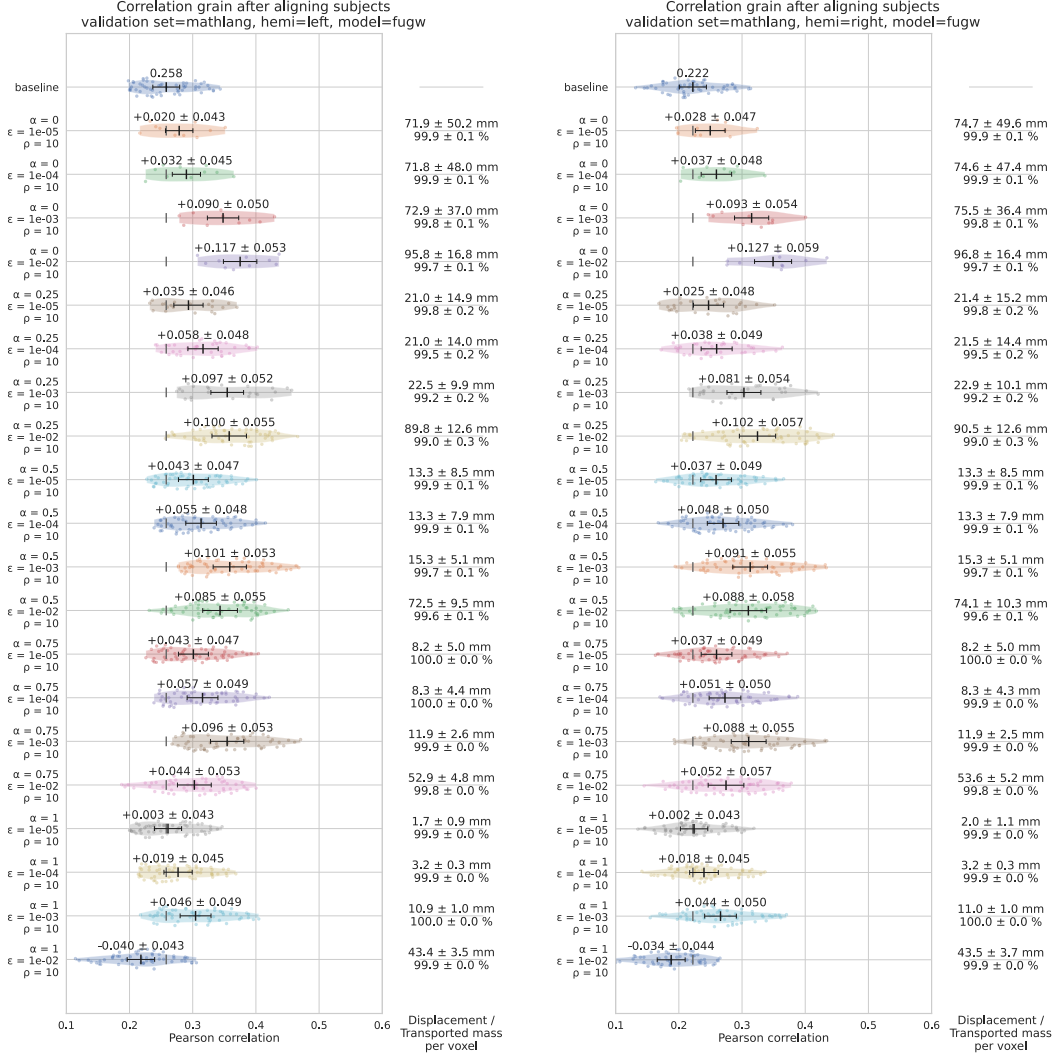

**Figure S3: Detailed correlation gains on the test set (Mathlang tasks) in the balanced case** Similarly to Figure S2, each line represents a FUGW model trained with different hyper-parameters. Each dot represents the mean correlation between contrast maps of the Mathlang protocol for a given pair of IBC subjects. We compare the average correlation with that of the baseline (top row) where subjects were simply projected on *fsaverage5*. Models for the left hemisphere and right hemisphere are shown respectively on the left and right side.

**Mesh resolution reduction** As mentioned in the core of this paper, aligning meshes with high resolutions can lead to dealing with matrices which won't fit on GPUs. This is typically the case when trying to align two *fsaverage7* hemispheres (160k vertices each) instead of *fsaverage5* hemispheres (10k vertices each).

In order to reduce the number  $n$  of aligned vertices, we first group them into small clusters using Ward's algorithm using a method described in [41]. In essence, this method iteratively groups adjacent vertices of a given individual based on feature similarity until  $I$  clusters have been formed. Then, for a given cluster  $u_i$  of the source subject  $s$ , we define its functional signal  $\hat{F}_{u_i}^s$  as the mean functional signal of vertices which belong to this cluster. Moreover, for two given clusters  $u_i$  and  $u_j$  of subject  $s$ , we define the anatomical distance  $\hat{D}_{u_i, u_j}^s$  between  $u_i$  and  $u_j$  as the mean geodesic distance between all pairs of vertices between the two clusters (akin to an Energy distance). Eventually, we derive analogous objects  $\hat{F}^t$  and  $\hat{D}^t$  for the target subject  $t$ , and end up in a configuration comparable to that of Experiment 1.

$$\hat{\mathbf{F}}_{u_i}^s \triangleq \frac{1}{|u_i|} \sum_{k \in u_i} \mathbf{F}_k^s \in \mathbb{R}^c$$

$$\hat{D}_{u_i, u_j}^s \triangleq \frac{1}{|u_i| \cdot |u_j|} \sum_{k \in u_i, l \in u_j} D_{k, l}^s$$

**Alignment to individual anatomy** We qualitatively control that alignments derived between individuals on their individual anatomies make sense in Figure S4.

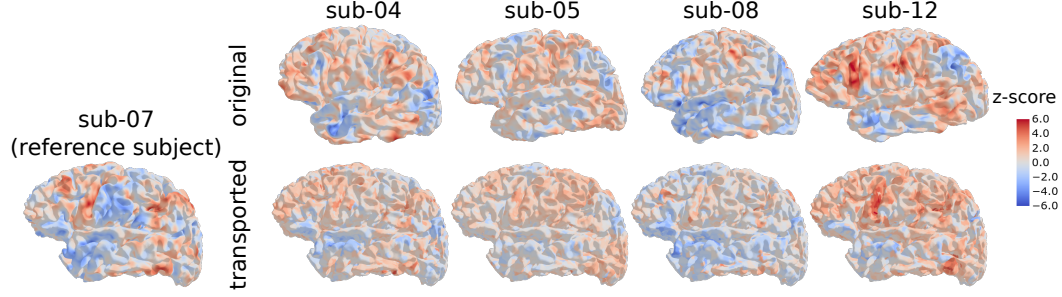

**Figure S4: Transporting individual maps onto a reference subject FUGW** can help bridge the absence of template anatomies and derive pairs of alignments such that all individuals of the cohort are comparable. We display a map taken from the test set contrasting areas activated during mathematical reasoning against areas activated for other stimuli of the protocol.

## A.5 Control experiments

**Controlling for smoothing effect increasing correlation** Alignments computed with FUGW are not always vertex-to-vertex alignments. Indeed, a single vertex from the source subject  $s$  can be associated with many vertices in the target subject  $t$ . In fact,  $\mathbf{P}_i^{s,t}$  represents the relative importance of each match. The hyper-parameter  $\varepsilon$  controls the entropy of  $\mathbf{P}^{s,t}$ , which is in direct link with the spread of vertices that we use as a measure for how many target vertices are matched with source vertices.

Since smoothing signal on the source subject can reduce noise and increase correlation to target data, we measure the correlation gain induced by applying a gaussian kernel to the source signal. This allows us to show that only a minor proportion of correlation gains induced by FUGW can come from this smoothing effect. Figure S5 shows this for kernels of 5mm, 10mm, 15mm and 20mm of standard deviation respectively. We see that correlation increases significantly less than when using FUGW (0.03 vs 0.12 correlation gain respectively). Moreover, one notices that even though correlation increases for pairs of subjects with a low initial correlation, it decreases for pairs with a high initial correlation. On the contrary, FUGW increases correlation for all pairs of subjects.

**Different training sets yield comparable correlation gains** While we leverage all IBC maps to derive our couplings, we show that the presented results hold when using a much smaller training dataset. In particular, we observe similar correlation gains when using only the 57 maps of the Archi protocol for training (see Table S3). It takes about one hour per subject to acquire these maps, which we advocate is a reasonable amount of time to build a training set dedicated to align subjects within a given cohort (and possibly across cohorts). Finally, we train both FUGW and MSM with lower-dimensional versions of the previous datasets. To do so, given a pair of subjects  $(s, t)$  to be aligned, we fit a PCA on the left out subjects, project the data of subjects to be aligned on these components, and keep the first 20 components only. For both models, correlation gains remained unchanged.

More explicitly, we test the 4 following training sets:

- ALL-MATH: all contrast maps of IBC except contrasts from the Mathlang protocol (369 features per subject)

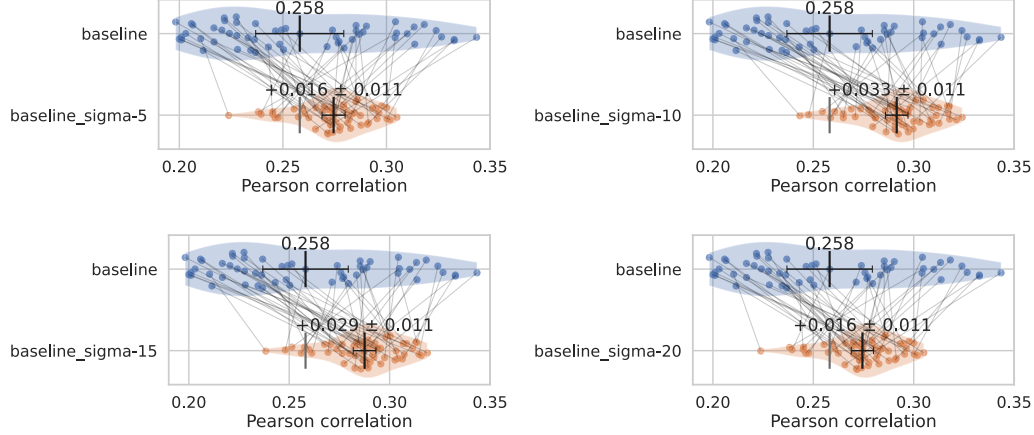

**Figure S5: Comparison of gains in correlation after Gaussian blurring** We compare correlation between subjects after the source subject’s functional data has been smoothed with a Gaussian kernel of standard deviation 5mm (top left), 10mm (top right), 15mm (bottom left) and 20mm (bottom right)

- ALL-MATH PCA: principal components fitted on ALL-MATH for all IBC subjects except  $s$  and  $t$  (20 features)
- ARCHI: all contrast maps from the Archi protocol of IBC (57 features)
- ARCHI PCA: principal components fitted on ARCHI for all subjects except  $s$  and  $t$  (20 features)

| Training set | FUGW | MSM  |
|--------------|------|------|
| ALL-MATH     | 0.12 | 0.01 |
| ALL-MATH PCA | 0.11 | 0.02 |
| ARCHI        | 0.10 | 0.02 |
| ARCHI PCA    | 0.11 | 0.01 |

**Table S1: Gain in Pearson correlation of aligned contrast maps from the Mathlang protocol compared to the baseline** The original correlation (baseline) is 0.258

**Using naturalistic stimuli to derive alignments with FUGW** This experiment’s setup is similar to that of Experiment 1: Using training features to first derive OT couplings, we then use the latter to assess correlation gains between subjects’s feature maps before and after subjects have been aligned. Naturalistic stimuli datasets include *Raiders of the Lost Ark*, short video clips and auditory stimuli from *The Little Prince* respectively adapted from [21, 27, 8]. Here, for each naturalistic dataset, we leverage work from [34] to derive the first  $m = 20$  components of a fitted shared response model. Shared response models seek to find a common dictionary  $\mathbf{K}$  of activation patterns across subjects  $s \in S$  and to derive a mapping  $\mathbf{W}^s$  with  $m$  orthogonal components that projects each individual’s data onto this common space:

$$\arg \min_{\mathbf{K}, \mathbf{W}^s} \sum_{s \in S} \|\mathbf{F}^s - \mathbf{W}^s \mathbf{K}\|^2$$

s.t.  $(\mathbf{W}^s)^T \cdot \mathbf{W}^s = \mathbf{I}_m$

These  $\mathbf{W}^s$  are then used for alignment.

Results are reported in Table S2 and show that using datasets which are 20 times less time-consuming than that of Experiment 1 can already yield significant correlation gain on unseen task data.

**Transporting myelin maps shows mild effect** Leveraging transport plans computed using fMRI data from Experiment 1, we transport myelin maps – approximated through T1 / T2 ratio maps – from the source subject to the target subject. We compare the correlation of the unaligned source



**Table S2:** Acquisition time (AT) and correlation gain on the left hemisphere (CG) per training set (baseline correlation = 0.258)

| Training set      | Type  | AT (min) | CG (Pearson) |
|-------------------|-------|----------|--------------|
| All-MATH          | tasks | 2000     | 0.118        |
| Clips             | movie | 100      | 0.017        |
| Raiders           | movie | 115      | 0.046        |
| The Little Prince | movie | 100      | 0.009        |

and target maps with the correlation of the transported and target maps. As illustrated in Figure S6, correlation gain is barely significant.

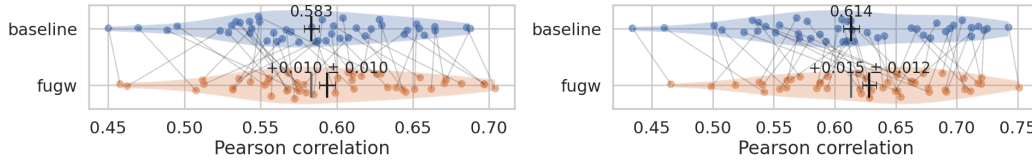

**Figure S6: Comparison of gains in correlation after inter-subject alignment for myelin maps**  
For each pair of source and target subjects of the IBC dataset, we compute the average Pearson correlation between myelin maps – approximated using T1/T2 ratios – for the left (left panel) and right (right panel) hemispheres. Correlation gains are not significant.

Before computing correlation between aforementioned maps, we discarded vertices located in the *cortical wall*, as they mostly contain spurious values. To do so, we set their value to the median of values of vertices which do not belong to the cortical wall. In order to determine which vertices belong to the *wall*, we used the Destrieux atlas [13].

Eventually, we advocate that little gain can be obtained when better aligning myelin maps, since they are already very stable across human subjects as shown in Figure S7.

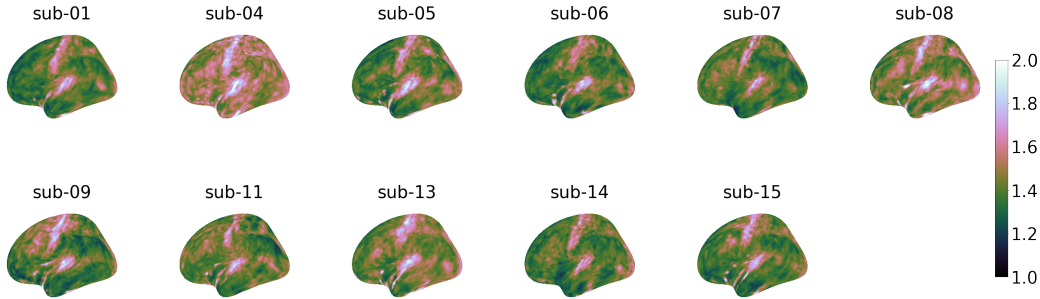

**Figure S7: Myelin maps (approximated using T1/T2 ratio maps) are very consistent across IBC participants**

## A.6 Dataset description

The presented experiments rely on the Individual Brain Charting (IBC) dataset. A detailed description of the preprocessing pipeline of the IBC data is provided in [32]. Raw data were preprocessed using *PyPreprocess*<sup>4</sup>.

All fMRI images, i.e. GE-EPI volumes, were collected twice with reversed phase-encoding directions, resulting in pairs of images with distortions going in opposite directions. Susceptibility-induced off-resonance field was estimated from the two Spin-Echo EPI volumes in reversed phase-encoding

<sup>4</sup><https://github.com/neurospin/pypreprocess>



directions. The images were corrected based on the estimated deformation model. Details about the method can be found in [3].

Further, the GE-EPI volumes were aligned to each other within every participant. A rigid-body transformation was employed, in which the average volume of all images was used as reference [17]. The anatomical and motion-corrected fMRI images were given as input to *FreeSurfer* v6.0.0, in order to extract meshes of the tissue interfaces and the sampling of functional activation on these meshes, as described in [42]. The corresponding maps were then resampled to the fsaverage7 (high resolution, 163k nodes per hemisphere) and fsaverage5 (low resolution, 10k nodes per hemisphere) templates of FreeSurfer [16].

fMRI data were analyzed using the *General Linear Model*. Regressors of the model were designed to capture variations in BOLD response strictly following stimulus timing specifications. They were estimated through the convolution of boxcar functions, that represent per-condition stimulus occurrences, with the canonical *Hemodynamic Response Function* (HRF). To build such models, paradigm descriptors grouped in triplets (i.e. onset time, duration and trial type) according to BIDS Specification were determined from the log files' registries generated by the stimulus-delivery software. To account for small fluctuations in the latency of the HRF peak response, additional regressors were computed based on the convolution of the same task-conditions profile with the time derivative of the HRF. Nuisance regressors were also added to the design matrix in order to minimize the final residual error. To remove signal variance associated with spurious effects arising from movements, six temporal regressors were defined for the motion parameters. Further, the first five principal components of the signal, extracted from voxels showing the 5% highest variance, were also regressed to capture physiological noise [7].

In addition, a discrete-cosine basis was included for high-pass filtering ( $cutoff = \frac{1}{128}$  Hz). Model specification was implemented using *Nilearn* v0.8.1 [2], a Python library for statistical learning on neuroimaging data (<https://nilearn.github.io>).

In tables S3, S4 and S5, we give the explicit list of contrast and condition maps used for training, validation and testing respectively.

**Table S3: Training data** This dataset comprises a wide variety of tasks: motor, visual, auditory, relational, linguistic, etc.

| Training data  |                                |
|----------------|--------------------------------|
| Task           | Condition / Contrast           |
| ArchiEmotional | expression_control             |
| ArchiEmotional | expression_gender              |
| ArchiEmotional | expression_gender-control      |
| ArchiEmotional | expression_intention           |
| ArchiEmotional | expression_intention-control   |
| ArchiEmotional | expression_intention-gender    |
| ArchiEmotional | face_control                   |
| ArchiEmotional | face_gender                    |
| ArchiEmotional | face_gender-control            |
| ArchiEmotional | face_trusty                    |
| ArchiEmotional | face_trusty-control            |
| ArchiEmotional | face_trusty-gender             |
| ArchiEmotional | trusty_and_intention-control   |
| ArchiEmotional | trusty_and_intention-gender    |
| ArchiSocial    | false_belief-mechanistic       |
| ArchiSocial    | false_belief-mechanistic_audio |
| ArchiSocial    | false_belief-mechanistic_video |
| ArchiSocial    | false_belief_audio             |
| ArchiSocial    | false_belief_video             |
| ArchiSocial    | mechanistic_audio              |
| ArchiSocial    | mechanistic_video              |
| ArchiSocial    | non_speech_sound               |
| ArchiSocial    | speech-non_speech              |
| ArchiSocial    | speech_sound                   |
| ArchiSocial    | triangle_mental                |
| ArchiSocial    | triangle_mental-random         |
| ArchiSocial    | triangle_random                |
| ArchiSpatial   | grasp-orientation              |
| ArchiSpatial   | hand-side                      |
| ArchiSpatial   | object_grasp                   |
| ArchiSpatial   | object_orientation             |
| ArchiSpatial   | rotation_hand                  |
| ArchiSpatial   | rotation_side                  |
| ArchiSpatial   | saccades                       |
| ArchiStandard  | audio_computation              |
| ArchiStandard  | audio_left_button_press        |
| ArchiStandard  | audio_right_button_press       |
| ArchiStandard  | audio_sentence                 |
| ArchiStandard  | cognitive-motor                |
| ArchiStandard  | computation                    |
| ArchiStandard  | computation-sentences          |
| ArchiStandard  | horizontal-vertical            |
| ArchiStandard  | horizontal_checkerboard        |
| ArchiStandard  | left-right_button_press        |
| ArchiStandard  | listening-reading              |
| ArchiStandard  | motor-cognitive                |
| ArchiStandard  | reading-checkerboard           |
| ArchiStandard  | reading-listening              |
| ArchiStandard  | right-left_button_press        |
| ArchiStandard  | sentences                      |
| ArchiStandard  | sentences-computation          |
| ArchiStandard  | vertical-horizontal            |

| Training data (next) |                                       |
|----------------------|---------------------------------------|
| Task                 | Condition / Contrast                  |
| ArchiStandard        | vertical_checkerboard                 |
| ArchiStandard        | video_computation                     |
| ArchiStandard        | video_left_button_press               |
| ArchiStandard        | video_right_button_press              |
| ArchiStandard        | video_sentence                        |
| Attention            | double_congruent                      |
| Attention            | double_cue                            |
| Attention            | double_incongruent                    |
| Attention            | double_incongruent-double_congruent   |
| Attention            | incongruent-congruent                 |
| Attention            | spatial_congruent                     |
| Attention            | spatial_cue                           |
| Attention            | spatial_cue-double_cue                |
| Attention            | spatial_incongruent                   |
| Attention            | spatial_incongruent-spatial_congruent |
| Audi                 | alphabet                              |
| Audi                 | alphabet-silence                      |
| Audi                 | animals                               |
| Audi                 | animals-silence                       |
| Audi                 | cough                                 |
| Audi                 | cough-silence                         |
| Audi                 | environment                           |
| Audi                 | environment-silence                   |
| Audi                 | human                                 |
| Audi                 | human-silence                         |
| Audi                 | laugh                                 |
| Audi                 | laugh-silence                         |
| Audi                 | music                                 |
| Audi                 | music-silence                         |
| Audi                 | reverse                               |
| Audi                 | reverse-silence                       |
| Audi                 | silence                               |
| Audi                 | speech                                |
| Audi                 | speech-silence                        |
| Audi                 | suomi                                 |
| Audi                 | suomi-silence                         |
| Audi                 | tear                                  |
| Audi                 | tear-silence                          |
| Audi                 | yawn                                  |
| Audi                 | yawn-silence                          |
| Audio                | animal                                |
| Audio                | animal-others                         |
| Audio                | animal-silence                        |
| Audio                | mean-silence                          |
| Audio                | music                                 |
| Audio                | music-others                          |
| Audio                | music-silence                         |
| Audio                | nature                                |
| Audio                | nature-others                         |
| Audio                | nature-silence                        |
| Audio                | speech                                |
| Audio                | speech-others                         |
| Audio                | speech-silence                        |
| Audio                | tool                                  |
| Audio                | tool-others                           |

### Training data (next)

| Task          | Condition / Contrast                                      |
|---------------|-----------------------------------------------------------|
| Audio         | tool-silence                                              |
| Audio         | voice                                                     |
| Audio         | voice-others                                              |
| Audio         | voice-silence                                             |
| Bang          | no_talk                                                   |
| Bang          | talk                                                      |
| Bang          | talk-no_talk                                              |
| ColumbiaCards | gain                                                      |
| ColumbiaCards | loss                                                      |
| ColumbiaCards | num_loss_cards                                            |
| Discount      | amount                                                    |
| Discount      | delay                                                     |
| DotPatterns   | correct_cue-incorrect_cue                                 |
| DotPatterns   | correct_cue_correct_probe                                 |
| DotPatterns   | correct_cue_incorrect_probe                               |
| DotPatterns   | correct_cue_incorrect_probe-correct_cue_correct_probe     |
| DotPatterns   | correct_cue_incorrect_probe-incorrect_cue_correct_probe   |
| DotPatterns   | cue                                                       |
| DotPatterns   | incorrect_cue_correct_probe                               |
| DotPatterns   | incorrect_cue_incorrect_probe                             |
| DotPatterns   | incorrect_cue_incorrect_probe-correct_cue_incorrect_probe |
| DotPatterns   | incorrect_cue_incorrect_probe-incorrect_cue_correct_probe |
| DotPatterns   | incorrect_probe-correct_probe                             |
| EmotionalPain | emotional-physical_pain                                   |
| EmotionalPain | emotional_pain                                            |
| EmotionalPain | physical_pain                                             |
| Enumeration   | enumeration_constant                                      |
| Enumeration   | enumeration_linear                                        |
| Enumeration   | enumeration_quadratic                                     |
| Lec1          | pseudoword                                                |
| Lec1          | pseudoword-random_string                                  |
| Lec1          | random_string                                             |
| Lec1          | word                                                      |
| Lec1          | word-pseudoword                                           |
| Lec1          | word-random_string                                        |
| Lec2          | attend                                                    |
| Lec2          | attend-unattend                                           |
| Lec2          | unattend                                                  |
| MCSE          | high-low_salience                                         |
| MCSE          | high_salience_left                                        |
| MCSE          | high_salience_right                                       |
| MCSE          | low+high_salience                                         |
| MCSE          | low-high_salience                                         |
| MCSE          | low_salience_left                                         |
| MCSE          | low_salience_right                                        |
| MCSE          | salience_left-right                                       |
| MCSE          | salience_right-left                                       |
| MTTNS         | northside-southside_event                                 |
| MTTNS         | sn_after-before_event                                     |
| MTTNS         | sn_after_event                                            |
| MTTNS         | sn_all_event_response                                     |
| MTTNS         | sn_all_space-time_cue                                     |
| MTTNS         | sn_all_space_cue                                          |
| MTTNS         | sn_all_time-space_cue                                     |
| MTTNS         | sn_all_time_cue                                           |

| Training data (next) |                                         |
|----------------------|-----------------------------------------|
| Task                 | Condition / Contrast                    |
| MTTNS                | sn_average_event                        |
| MTTNS                | sn_average_reference                    |
| MTTNS                | sn_before-after_event                   |
| MTTNS                | sn_before_event                         |
| MTTNS                | sn_northside_event                      |
| MTTNS                | sn_southside_event                      |
| MTTNS                | sn_space-time_event                     |
| MTTNS                | sn_space_event                          |
| MTTNS                | sn_time-space_event                     |
| MTTNS                | sn_time_event                           |
| MTTNS                | southside-northside_event               |
| MTTWE                | eastside-westside_event                 |
| MTTWE                | we_after-before_event                   |
| MTTWE                | we_after_event                          |
| MTTWE                | we_all_event_response                   |
| MTTWE                | we_all_space-time_cue                   |
| MTTWE                | we_all_space_cue                        |
| MTTWE                | we_all_time-space_cue                   |
| MTTWE                | we_all_time_cue                         |
| MTTWE                | we_average_event                        |
| MTTWE                | we_average_reference                    |
| MTTWE                | we_before-after_event                   |
| MTTWE                | we_before_event                         |
| MTTWE                | we_eastside_event                       |
| MTTWE                | we_space-time_event                     |
| MTTWE                | we_space_event                          |
| MTTWE                | we_time-space_event                     |
| MTTWE                | we_time_event                           |
| MTTWE                | we_westside_event                       |
| MTTWE                | westside-eastside_event                 |
| MVEB                 | 2_letters_different                     |
| MVEB                 | 2_letters_different-same                |
| MVEB                 | 2_letters_same                          |
| MVEB                 | 4_letters_different                     |
| MVEB                 | 4_letters_different-same                |
| MVEB                 | 4_letters_same                          |
| MVEB                 | 6_letters_different                     |
| MVEB                 | 6_letters_different-2_letters_different |
| MVEB                 | 6_letters_different-same                |
| MVEB                 | 6_letters_same                          |
| MVEB                 | letter_occurrence_response              |
| MVIS                 | 2_dots-2_dots_control                   |
| MVIS                 | 4_dots-4_dots_control                   |
| MVIS                 | 6_dots-2_dots                           |
| MVIS                 | 6_dots-6_dots_control                   |
| MVIS                 | dot_displacement_response               |
| MVIS                 | dots-control                            |
| Moto                 | finger_left-fixation                    |
| Moto                 | finger_right-fixation                   |
| Moto                 | foot_left-fixation                      |
| Moto                 | foot_right-fixation                     |
| Moto                 | hand_left-fixation                      |
| Moto                 | hand_right-fixation                     |
| Moto                 | instructions                            |
| Moto                 | saccade-fixation                        |

### Training data (next)

| Task                | Condition / Contrast         |
|---------------------|------------------------------|
| Moto                | tongue-fixation              |
| PainMovie           | movie_mental                 |
| PainMovie           | movie_mental-pain            |
| PainMovie           | movie_pain                   |
| Preference          | face-others                  |
| Preference          | food-others                  |
| Preference          | house-others                 |
| Preference          | painting-others              |
| Preference          | preference_constant          |
| Preference          | preference_linear            |
| Preference          | preference_quadratic         |
| PreferenceFaces     | face_constant                |
| PreferenceFaces     | face_linear                  |
| PreferenceFaces     | face_quadratic               |
| PreferenceFood      | food_constant                |
| PreferenceFood      | food_linear                  |
| PreferenceFood      | food_quadratic               |
| PreferenceHouses    | house_constant               |
| PreferenceHouses    | house_linear                 |
| PreferenceHouses    | house_quadratic              |
| PreferencePaintings | painting_constant            |
| PreferencePaintings | painting_linear              |
| PreferencePaintings | painting_quadratic           |
| RSVPLanguage        | complex                      |
| RSVPLanguage        | complex-consonant_string     |
| RSVPLanguage        | complex-simple               |
| RSVPLanguage        | consonant_string             |
| RSVPLanguage        | jabberwocky                  |
| RSVPLanguage        | jabberwocky-consonant_string |
| RSVPLanguage        | jabberwocky-pseudo           |
| RSVPLanguage        | probe                        |
| RSVPLanguage        | pseudo-consonant_string      |
| RSVPLanguage        | pseudoword_list              |
| RSVPLanguage        | sentence-consonant_string    |
| RSVPLanguage        | sentence-jabberwocky         |
| RSVPLanguage        | sentence-pseudo              |
| RSVPLanguage        | sentence-word                |
| RSVPLanguage        | simple                       |
| RSVPLanguage        | simple-consonant_string      |
| RSVPLanguage        | word-consonant_string        |
| RSVPLanguage        | word-pseudo                  |
| RSVPLanguage        | word_list                    |
| SelectiveStopSignal | go_critical                  |
| SelectiveStopSignal | go_critical-stop             |
| SelectiveStopSignal | go_noncritical               |
| SelectiveStopSignal | go_noncritical-ignore        |
| SelectiveStopSignal | ignore                       |
| SelectiveStopSignal | ignore-stop                  |
| SelectiveStopSignal | stop                         |
| SelectiveStopSignal | stop-ignore                  |
| Self                | correct_rejection            |
| Self                | encode_other                 |
| Self                | encode_self                  |
| Self                | encode_self-other            |
| Self                | false_alarm                  |

| Training data (next) |                                   |
|----------------------|-----------------------------------|
| Task                 | Condition / Contrast              |
| Self                 | instructions                      |
| Self                 | recognition_hit                   |
| Self                 | recognition_hit-correct_rejection |
| Self                 | recognition_other_hit             |
| Self                 | recognition_self-other            |
| Self                 | recognition_self_hit              |
| StopSignal           | go                                |
| StopSignal           | stop                              |
| StopSignal           | stop-go                           |
| Stroop               | congruent                         |
| Stroop               | incongruent                       |
| Stroop               | incongruent-congruent             |
| TheoryOfMind         | belief                            |
| TheoryOfMind         | belief-photo                      |
| TheoryOfMind         | photo                             |
| TwoByTwo             | cue_switch-stay                   |
| TwoByTwo             | cue_taskstay_cuestay              |
| TwoByTwo             | cue_taskstay_cueswitch            |
| TwoByTwo             | cue_taskswitch_cuestay            |
| TwoByTwo             | cue_taskswitch_cueswitch          |
| TwoByTwo             | stim_taskstay_cuestay             |
| TwoByTwo             | stim_taskstay_cueswitch           |
| TwoByTwo             | stim_taskswitch_cuestay           |
| TwoByTwo             | stim_taskswitch_cueswitch         |
| TwoByTwo             | task_switch-stay                  |
| VSTM                 | vstm_constant                     |
| VSTM                 | vstm_linear                       |
| VSTM                 | vstm_quadratic                    |
| Visu                 | animal                            |
| Visu                 | animal-scrambled                  |
| Visu                 | characters                        |
| Visu                 | characters-scrambled              |
| Visu                 | face                              |
| Visu                 | face-scrambled                    |
| Visu                 | house                             |
| Visu                 | house-scrambled                   |
| Visu                 | pseudoword                        |
| Visu                 | pseudoword-scrambled              |
| Visu                 | scene                             |
| Visu                 | scene-scrambled                   |
| Visu                 | scrambled                         |
| Visu                 | target_fruit                      |
| Visu                 | tool                              |
| Visu                 | tool-scrambled                    |
| WardAndAllport       | ambiguous-unambiguous             |
| WardAndAllport       | intermediate-direct               |
| WardAndAllport       | move_ambiguous_direct             |
| WardAndAllport       | move_ambiguous_intermediate       |
| WardAndAllport       | move_unambiguous_direct           |
| WardAndAllport       | move_unambiguous_intermediate     |
| WardAndAllport       | planning_ambiguous_direct         |
| WardAndAllport       | planning_ambiguous_intermediate   |
| WardAndAllport       | planning_unambiguous_direct       |
| WardAndAllport       | planning_unambiguous_intermediate |



**Table S4:** Validation data

| <b>Validation data</b> |                      |
|------------------------|----------------------|
| Task                   | Condition / Contrast |
| HcpEmotion             | face                 |
| HcpEmotion             | face-shape           |
| HcpEmotion             | shape                |
| HcpEmotion             | shape-face           |
| HcpGambling            | punishment           |
| HcpGambling            | punishment-reward    |
| HcpGambling            | reward               |
| HcpGambling            | reward-punishment    |
| HcpLanguage            | math                 |
| HcpLanguage            | math-story           |
| HcpLanguage            | story                |
| HcpLanguage            | story-math           |
| HcpMotor               | cue                  |
| HcpMotor               | left_foot            |
| HcpMotor               | left_foot-avg        |
| HcpMotor               | left_hand            |
| HcpMotor               | left_hand-avg        |
| HcpMotor               | right_foot           |
| HcpMotor               | right_foot-avg       |
| HcpMotor               | right_hand           |
| HcpMotor               | right_hand-avg       |
| HcpMotor               | tongue               |
| HcpMotor               | tongue-avg           |
| HcpRelational          | match                |
| HcpRelational          | relational           |
| HcpRelational          | relational-match     |
| HcpSocial              | mental               |
| HcpSocial              | mental-random        |
| HcpSocial              | random               |
| HcpWm                  | 0back-2back          |
| HcpWm                  | 0back_body           |
| HcpWm                  | 0back_face           |
| HcpWm                  | 0back_place          |
| HcpWm                  | 0back_tools          |
| HcpWm                  | 2back-0back          |
| HcpWm                  | 2back_body           |
| HcpWm                  | 2back_face           |
| HcpWm                  | 2back_place          |
| HcpWm                  | 2back_tools          |
| HcpWm                  | body-avg             |
| HcpWm                  | face-avg             |
| HcpWm                  | place-avg            |
| HcpWm                  | tools-avg            |

**Table S5:** Test data

| <b>Test data</b> |                                    |
|------------------|------------------------------------|
| Task             | Condition / Contrast               |
| MathLanguage     | arithmetic_fact-othermath          |
| MathLanguage     | arithmetic_fact_auditory           |
| MathLanguage     | arithmetic_fact_visual             |
| MathLanguage     | arithmetic_principle-othermath     |
| MathLanguage     | arithmetic_principle_auditory      |
| MathLanguage     | arithmetic_principle_visual        |
| MathLanguage     | auditory-visual                    |
| MathLanguage     | colorlessg-wordlist                |
| MathLanguage     | colorlessg_auditory                |
| MathLanguage     | colorlessg_visual                  |
| MathLanguage     | context-general                    |
| MathLanguage     | context-theory_of_mind             |
| MathLanguage     | context_auditory                   |
| MathLanguage     | context_visual                     |
| MathLanguage     | general-colorlessg                 |
| MathLanguage     | general_auditory                   |
| MathLanguage     | general_visual                     |
| MathLanguage     | geometry-othermath                 |
| MathLanguage     | geometry_fact_auditory             |
| MathLanguage     | geometry_fact_visual               |
| MathLanguage     | math-nonmath                       |
| MathLanguage     | nonmath-math                       |
| MathLanguage     | theory_of_mind-context             |
| MathLanguage     | theory_of_mind-general             |
| MathLanguage     | theory_of_mind_and_context-general |
| MathLanguage     | theory_of_mind_auditory            |
| MathLanguage     | theory_of_mind_visual              |
| MathLanguage     | visual-auditory                    |
| MathLanguage     | wordlist_auditory                  |
| MathLanguage     | wordlist_visual                    |

## References

- [1] Alexandre Abraham et al. “Machine learning for neuroimaging with scikit-learn”. In: *Frontiers in Neuroinformatics* 8 (2014). ISSN: 1662-5196. URL: <https://www.frontiersin.org/article/10.3389/fninf.2014.00014> (visited on 05/19/2022).
- [2] Alexandre Abraham et al. “Machine learning for neuroimaging with scikit-learn”. In: *Front Neuroinform* 8 (2014), p. 14. ISSN: 1662-5196. URL: <https://doi.org/10.3389/fninf.2014.00014>.
- [3] Jesper L.R. Andersson, Stefan Skare, and John Ashburner. “How to correct susceptibility distortions in spin-echo echo-planar images: application to diffusion tensor imaging”. In: *Neuroimage* 20.2 (2003), pp. 870–888. ISSN: 1053-8119. URL: [http://doi.org/10.1016/S1053-8119\(03\)00336-7](http://doi.org/10.1016/S1053-8119(03)00336-7).
- [4] B.B. Avants et al. “Symmetric diffeomorphic image registration with cross-correlation: Evaluating automated labeling of elderly and neurodegenerative brain”. In: *Medical Image Analysis* 12.1 (2008), pp. 26–41. ISSN: 1361-8415. DOI: 10.1016/j.media.2007.06.004. URL: <http://www.sciencedirect.com/science/article/pii/S1361841507000606>.
- [5] Thomas BAZEILLE et al. “Local Optimal Transport for Functional Brain Template Estimation”. In: *IPMI 2019 - 26th International Conference on Information Processing in Medical Imaging*. Hong Kong, China, June 2019. DOI: 10.1007/978-3-030-20351-1\_18. URL: <https://hal.archives-ouvertes.fr/hal-02278663>.
- [6] Thomas Bazeille et al. “An empirical evaluation of functional alignment using inter-subject decoding”. In: *NeuroImage* 245 (Dec. 15, 2021), p. 118683. ISSN: 1053-8119. DOI: 10.1016/j.neuroimage.2021.118683. URL: <https://www.sciencedirect.com/science/article/pii/S1053811921009563>.
- [7] Yashar Behzadi et al. “A component based noise correction method (CompCor) for {BOLD} and perfusion based fMRI”. In: *Neuroimage* 37.1 (2007), pp. 90–101. ISSN: 1053-8119. URL: <https://doi.org/10.1016/j.neuroimage.2007.04.042>.
- [8] Shohini Bhattachali et al. “Localising memory retrieval and syntactic composition: an fMRI study of naturalistic language comprehension”. In: *Language, Cognition and Neuroscience* 34.4 (2019), pp. 491–510.
- [9] Laetitia Chapel et al. “Unbalanced Optimal Transport through Non-negative Penalized Linear Regression”. In: *arXiv:2106.04145 [cs, math, stat]* (June 8, 2021). arXiv: 2106.04145. URL: <http://arxiv.org/abs/2106.04145>.
- [10] Po-Hsuan (Cameron) Chen et al. “A Reduced-Dimension fMRI Shared Response Model”. In: *Advances in Neural Information Processing Systems*. Ed. by C. Cortes et al. Vol. 28. Curran Associates, Inc., 2015. URL: <https://proceedings.neurips.cc/paper/2015/file/b3967a0e938dc2a6340e258630febd5a-Paper.pdf>.
- [11] Lenaïc Chizat et al. “Unbalanced Optimal Transport: Dynamic and Kantorovich Formulation”. In: *arXiv:1508.05216 [math]* (Feb. 9, 2019). arXiv: 1508.05216. URL: <http://arxiv.org/abs/1508.05216>.
- [12] Anders M. Dale, Bruce Fischl, and Martin I. Sereno. “Cortical Surface-Based Analysis: I. Segmentation and Surface Reconstruction”. In: 9.2 (1999), pp. 179–194. ISSN: 1053-8119. DOI: 10.1006/nimg.1998.0395. URL: <http://www.sciencedirect.com/science/article/pii/S1053811998903950>.
- [13] Christophe Destrieux et al. “Automatic parcellation of human cortical gyri and sulci using standard anatomical nomenclature”. In: *NeuroImage* 53.1 (Oct. 15, 2010), pp. 1–15. ISSN: 1053-8119. DOI: 10.1016/j.neuroimage.2010.06.010. URL: <https://www.sciencedirect.com/science/article/pii/S1053811910008542> (visited on 08/02/2022).
- [14] Nicole Eichert et al. “Cross-species cortical alignment identifies different types of anatomical reorganization in the primate temporal lobe”. In: *eLife* 9 (Mar. 23, 2020). Ed. by Timothy Verstynen et al. Publisher: eLife Sciences Publications, Ltd, e53232. ISSN: 2050-084X. DOI: 10.7554/eLife.53232. URL: <https://doi.org/10.7554/eLife.53232>.
- [15] Bruce Fischl. “FreeSurfer”. In: *NeuroImage. 20 YEARS OF fMRI* 62.2 (Aug. 15, 2012), pp. 774–781. ISSN: 1053-8119. DOI: 10.1016/j.neuroimage.2012.01.021. URL: <https://www.sciencedirect.com/science/article/pii/S1053811912000389>.

- [16] Bruce Fischl et al. “High-resolution intersubject averaging and a coordinate system for the cortical surface”. In: *Hum Brain Mapp* 8.4 (1999), pp. 272–284. URL: [https://doi.org/10.1002/\(SICI\)1097-0193\(1999\)8:4%3C272::AID-HBM10%3E3.0.CO;2-4](https://doi.org/10.1002/(SICI)1097-0193(1999)8:4%3C272::AID-HBM10%3E3.0.CO;2-4).
- [17] K.J. Friston et al. “Characterizing Dynamic Brain Responses with fMRI: a Multivariate Approach”. In: *Neuroimage* 2.2 (1995), pp. 166–172. URL: <https://doi.org/10.1006/nimg.1995.1019>.
- [18] Matthew F Glasser et al. “A multi-modal parcellation of human cerebral cortex”. en. In: *Nature* 536.7615 (Aug. 2016), pp. 171–178.
- [19] Alexandre Gramfort, Gabriel Peyré, and Marco Cuturi. *Fast Optimal Transport Averaging of Neuroimaging Data*. 2015. DOI: 10.48550/ARXIV.1503.08596. URL: <https://arxiv.org/abs/1503.08596>.
- [20] J. Swaroop Guntupalli et al. “A Model of Representational Spaces in Human Cortex”. In: *Cerebral Cortex* 26.6 (June 1, 2016). Publisher: Oxford Academic, pp. 2919–2934. ISSN: 1047-3211. DOI: 10.1093/cercor/bhw068. URL: <https://academic.oup.com/cercor/article/26/6/2919/1754308>.
- [21] James V. Haxby et al. “A common, high-dimensional model of the representational space in human ventral temporal cortex”. In: *Neuron* 72.2 (Oct. 20, 2011), pp. 404–416. ISSN: 1097-4199. DOI: 10.1016/j.neuron.2011.08.026.
- [22] Matthias Liero, Alexander Mielke, and Giuseppe Savaré. “Optimal Entropy-Transport problems and a new Hellinger–Kantorovich distance between positive measures”. In: *Inventiones mathematicae* 211.3 (Mar. 1, 2018), pp. 969–1117. ISSN: 1432-1297. DOI: 10.1007/s00222-017-0759-8. URL: <https://doi.org/10.1007/s00222-017-0759-8>.
- [23] Rogier B Mars et al. “Whole brain comparative anatomy using connectivity blueprints”. In: *eLife* 7 (May 11, 2018). Ed. by Klaas Enno Stephan. Publisher: eLife Sciences Publications, Ltd, e35237. ISSN: 2050-084X. DOI: 10.7554/eLife.35237. URL: <https://doi.org/10.7554/eLife.35237>.
- [24] Facundo Memoli. *On the use of Gromov-Hausdorff Distances for Shape Comparison*. Accepted: 2014-01-29T16:52:11Z ISSN: 1811-7813. The Eurographics Association, 2007. ISBN: 978-3-905673-51-7. DOI: 10.2312/SPBG/SPBG07/081-090. URL: <https://diglib.eg.org:443/xmlui/handle/10.2312/SPBG.SPBG07.081-090>.
- [25] Facundo Mémoli. “Gromov–Wasserstein Distances and the Metric Approach to Object Matching”. In: *Foundations of Computational Mathematics* 11.4 (Aug. 1, 2011), pp. 417–487. ISSN: 1615-3383. DOI: 10.1007/s10208-011-9093-5. URL: <https://doi.org/10.1007/s10208-011-9093-5>.
- [26] Franz-Xaver Neubert et al. “Comparison of human ventral frontal cortex areas for cognitive control and language with areas in monkey frontal cortex”. In: *Neuron* 81.3 (Feb. 5, 2014), pp. 700–713. ISSN: 1097-4199. DOI: 10.1016/j.neuron.2013.11.012.
- [27] Shinji Nishimoto et al. “Reconstructing visual experiences from brain activity evoked by natural movies”. In: *Current biology* 21.19 (2011), pp. 1641–1646.
- [28] Adam Paszke et al. “PyTorch: An Imperative Style, High-Performance Deep Learning Library”. In: *Advances in Neural Information Processing Systems* 32. Ed. by H. Wallach et al. Curran Associates, Inc., 2019, pp. 8024–8035. URL: <http://papers.neurips.cc/paper/9015-pytorch-an-imperative-style-high-performance-deep-learning-library.pdf>.
- [29] F. Pedregosa et al. “Scikit-learn: Machine Learning in Python”. In: *Journal of Machine Learning Research* 12 (2011), pp. 2825–2830.
- [30] Gabriel Peyré, Marco Cuturi, and Justin Solomon. “Gromov-Wasserstein Averaging of Kernel and Distance Matrices”. In: *Proceedings of The 33rd International Conference on Machine Learning*. International Conference on Machine Learning. ISSN: 1938-7228. PMLR, June 11, 2016, pp. 2664–2672. URL: <https://proceedings.mlr.press/v48/peyre16.html>.
- [31] Ana Luísa Pinho et al. “Individual Brain Charting, a high-resolution fMRI dataset for cognitive mapping”. In: *Scientific Data* 5 (June 2018), p. 180105. DOI: 10.1038/sdata.2018.105. URL: <https://hal.archives-ouvertes.fr/hal-01817528>.
- [32] Ana Luísa Pinho et al. “Subject-specific segregation of functional territories based on deep phenotyping”. In: *Hum Brain Mapp* 42.4 (2021), pp. 841–870. URL: <https://doi.org/10.1002/hbm.25189>.

- [33] F. Pizzagalli et al. “The reliability and heritability of cortical folds and their genetic correlations across hemispheres”. In: *Commun Biol* 3.1 (Sept. 2020), p. 510.
- [34] Hugo Richard et al. “Modeling shared responses in neuroimaging studies through multiview ica”. In: *Advances in Neural Information Processing Systems* 33 (2020), pp. 19149–19162.
- [35] Emma C. Robinson et al. “MSM: a new flexible framework for Multimodal Surface Matching”. In: *NeuroImage* 100 (Oct. 15, 2014), pp. 414–426. ISSN: 1095-9572. DOI: 10.1016/j.neuroimage.2014.05.069.
- [36] Emma C. Robinson et al. “Multimodal surface matching with higher-order smoothness constraints”. In: *NeuroImage* 167 (2018), pp. 453–465. ISSN: 1095-9572. DOI: 10.1016/j.neuroimage.2017.10.037.
- [37] Mert R. Sabuncu et al. “Function-based intersubject alignment of human cortical anatomy”. In: *Cerebral Cortex (New York, N.Y.: 1991)* 20.1 (Jan. 2010), pp. 130–140. ISSN: 1460-2199. DOI: 10.1093/cercor/bhp085.
- [38] Marian Schneider et al. “Columnar clusters in the human motion complex reflect consciously perceived motion axis”. In: *Proceedings of the National Academy of Sciences* 116.11 (2019), pp. 5096–5101. DOI: 10.1073/pnas.1814504116. eprint: <https://www.pnas.org/doi/pdf/10.1073/pnas.1814504116>. URL: <https://www.pnas.org/doi/abs/10.1073/pnas.1814504116>.
- [39] Thibault Séjourné, François-Xavier Vialard, and Gabriel Peyré. “The Unbalanced Gromov Wasserstein Distance: Conic Formulation and Relaxation”. In: *arXiv:2009.04266 [math, stat]* (June 8, 2021). arXiv: 2009.04266. URL: <http://arxiv.org/abs/2009.04266>.
- [40] Ido Tavor et al. “Task-free MRI predicts individual differences in brain activity during task performance”. In: *Science* 352.6282 (2016), pp. 216–220.
- [41] Bertrand Thirion et al. “Which fMRI clustering gives good brain parcellations?” In: *Frontiers in Neuroscience* 8.167 (May 2014), p. 13. DOI: 10.3389/fnins.2014.00167. URL: <https://hal.inria.fr/hal-01015172>.
- [42] D. C. Van Essen et al. “Parcellations and hemispheric asymmetries of human cerebral cortex analyzed on surface-based atlases”. In: *Cereb Cortex* 22.10 (Oct. 2012), pp. 2241–2262.
- [43] D. C. Van Essen et al. “The WU-Minn Human Connectome Project: an overview”. In: *Neuroimage* 80 (Oct. 2013), pp. 62–79.
- [44] Titouan Vayer et al. “Fused Gromov-Wasserstein distance for structured objects: theoretical foundations and mathematical properties”. In: *arXiv:1811.02834 [cs, stat]* (Nov. 7, 2018). arXiv: 1811.02834. URL: <http://arxiv.org/abs/1811.02834>.
- [45] S. Al-Wasity et al. “Hyperalignment of motor cortical areas based on motor imagery during action observation”. In: *Sci Rep* 10.1 (Mar. 2020), p. 5362.
- [46] Ting Xu et al. “Cross-species functional alignment reveals evolutionary hierarchy within the connectome”. In: *NeuroImage* 223 (Dec. 1, 2020), p. 117346. ISSN: 1053-8119. DOI: 10.1016/j.neuroimage.2020.117346. URL: <http://www.sciencedirect.com/science/article/pii/S1053811920308326>.
- [47] B.T. Thomas Yeo et al. “Spherical Demons: Fast Diffeomorphic Landmark-Free Surface Registration”. In: *IEEE transactions on medical imaging* 29.3 (Mar. 2010), pp. 650–668. ISSN: 0278-0062. DOI: 10.1109/TMI.2009.2030797. URL: <https://www.ncbi.nlm.nih.gov/pmc/articles/PMC2862393/>.
